# Supplementary material for: Comparison of chemiluminescent heterogeneous and homogeneous–heterogeneous assays coupled with isothermal circular strand-displacement polymerization reaction amplification for the quantification of miRNA-141
Source: Royal Society of Chemistry journal article supplement (doi:10.1039/d2an00921h), 2022-01-01
Supplement: d2an00921h1.pdf [file d2an00921h1.pdf]

## Supporting information

### **Comparison of chemiluminescent heterogeneous and homogeneous-heterogeneous assays coupled with isothermal circular strand-displacement polymerization reaction amplification for the quantification of miRNA-141**

Anton M. Solovjev,<sup>a</sup> Ivan I. Galkin,<sup>b</sup> Alexey V. Medved'ko,<sup>c</sup> Olga Yu. Pletjushkina,<sup>b</sup>  
Shulin Zhao\*<sup>d</sup> and Ivan Yu. Sakharov<sup>a</sup>

<sup>a</sup>Department of Chemistry, Lomonosov Moscow State University, Leninskie gory, bldg.1, Moscow, 119991, Russia; sakharovivan@gmail.com

<sup>b</sup>A.N. Belozersky Research Institute of Physico-Chemical Biology, Lomonosov Moscow State University, Leninskie gory, bldg.1, Moscow 119992, Russia

<sup>c</sup>N.D. Zelinsky Institute of Organic Chemistry RAS, Leninsky prospect, 47, Moscow, 119991, Russia

<sup>d</sup>State Key Laboratory for the Chemistry and Molecular Engineering of Medicinal Resources, Guangxi Normal University, Guilin 541004, China

\*Correspondence: Shulin Zhao; zhaoshulin001@163.com

**Table S1.** Chemical structures of oligonucleotides used in this work

| oligonucleotides                           | 5'→3' sequence                                                 |
|--------------------------------------------|----------------------------------------------------------------|
| miRNA-141                                  | UAA CAC UGU CUG GUA AAG AUG G                                  |
| fluorescein-labeled hairpin 1<br>(Flu-HP1) | FAM- TCG TGA ACC ATC TTT ACC AGA<br>CAG TGT TAG ATG GTT CAC GA |
| fluorescein-labeled hairpin 2<br>(Flu-HP2) | FAM- ACG TGA ACC ATC TTT ACC AGA<br>CAG TGT TAG ATG GTT CAC GA |
| fluorescein-labeled hairpin 3<br>(Flu-HP3) | FAM- AGG TGA ACC ATC TTT ACC AGA<br>CAG TGT TAG ATG GTT CAC GA |
| biotinylated primer                        | Biotin – TCG TGA AC                                            |
| biotinylated DNA analogue of<br>miRNA-141  | TAA CAC TGT CTG GTA AAG ATG G -<br>Biotin                      |
| miRNA-39                                   | UCA CCG GGU GUA AAU CAG CUU G                                  |
| miRNA-429                                  | UAA UAC UGU CUG GUA AAA CCG U                                  |
| miRNA-200a                                 | UAA CAC UGU CUG GUA ACG AUG U                                  |
| miRNA-200b                                 | UAA UAC UGC CUG GUA AUG AUG A                                  |
| miRNA-200c                                 | UAA UAC UGC CGG GUA AUG AUG GA                                 |

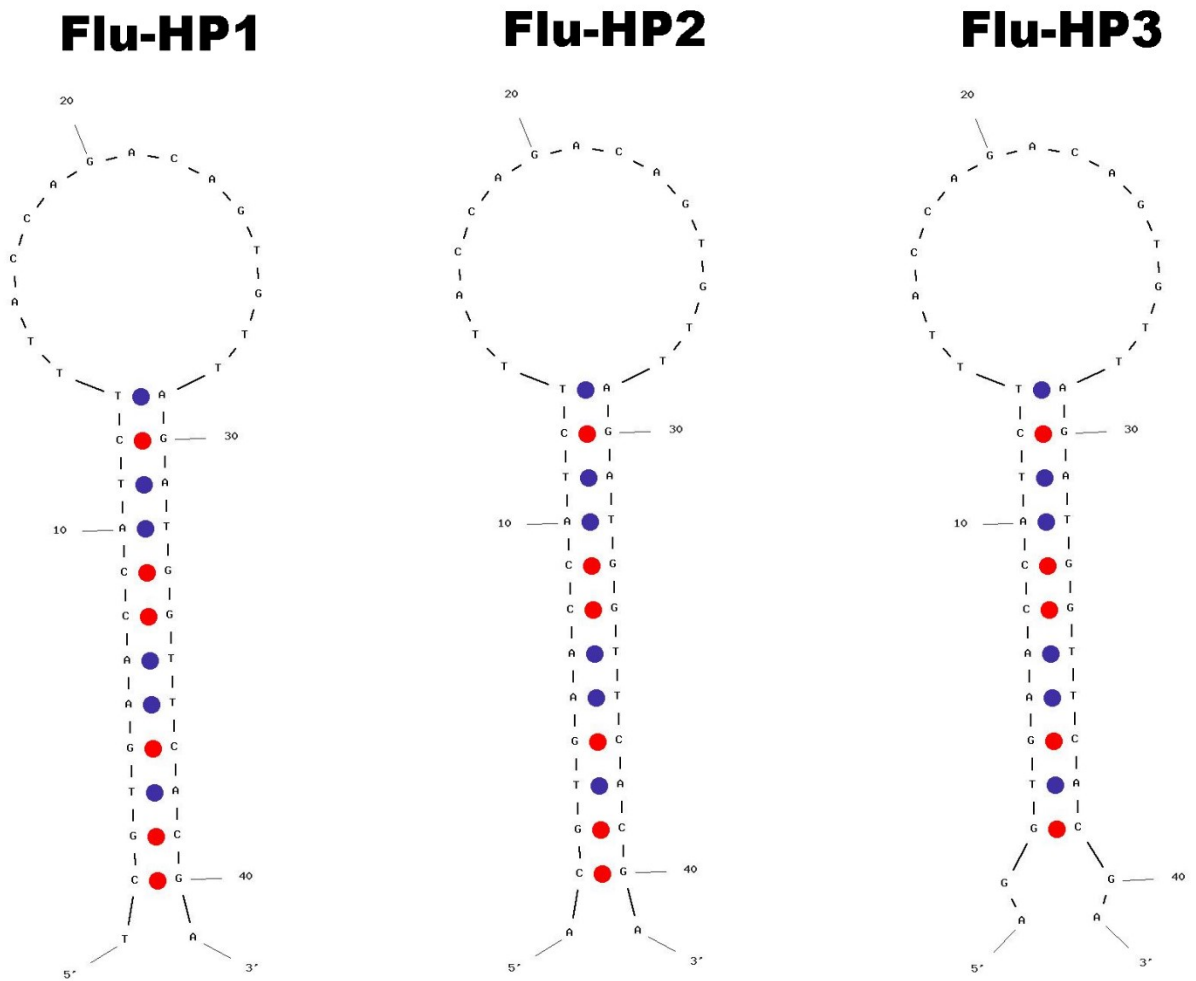

**Figure S1.** Secondary structures of Flu-labeled capture hairpin probes. Modeling of the hairpin structure was carried out using OligoAnalyzer 3.1 software.

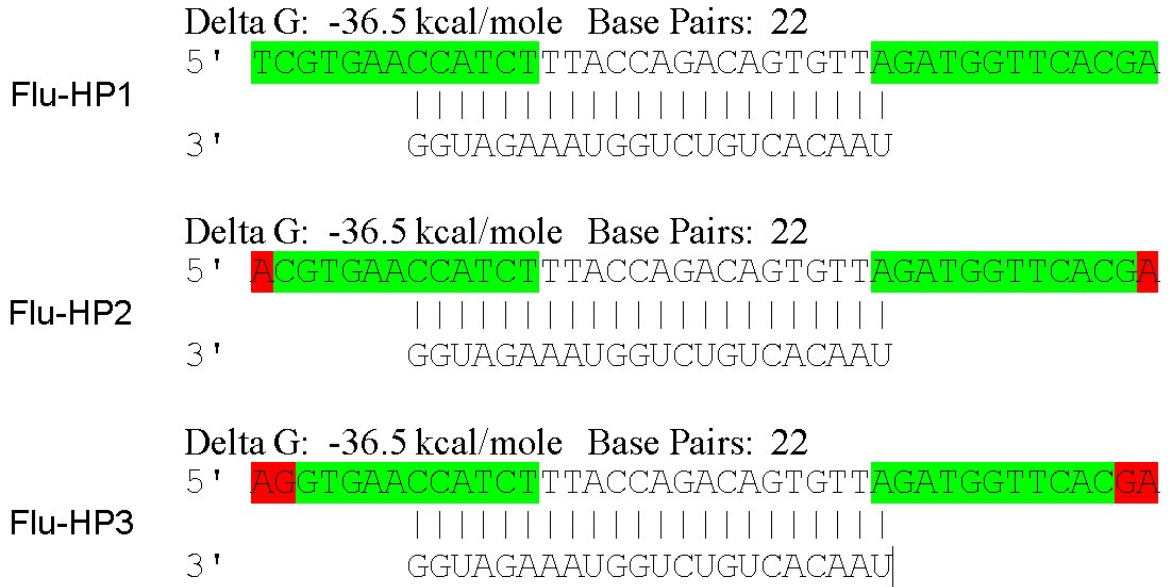

**Figure S2.** Interactions of Flu-labeled capture hairpin-probes with the target miRNA-141. Modeling of the hairpin structure was carried out using Oligo Analyzer 3.1 software.
